# Supplementary figures and images for: CD73 Promotes Tumor Progression in Patients with Esophageal Squamous Cell Carcinoma
Source: MDPI journal article supplement (doi:10.3390/cancers13163982), 2021-08-09

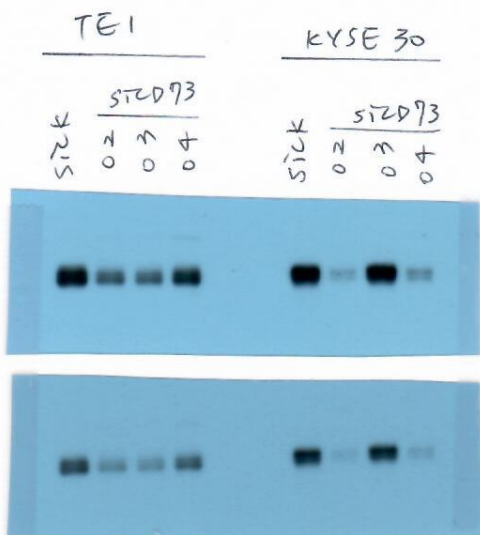

CD73.

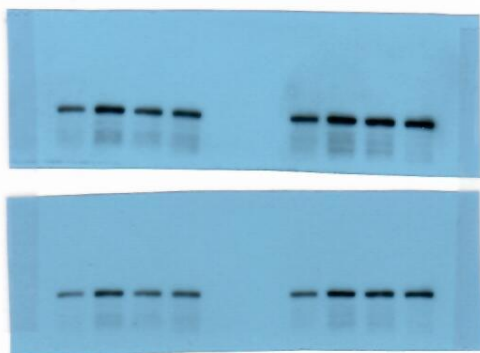

E-cadherin

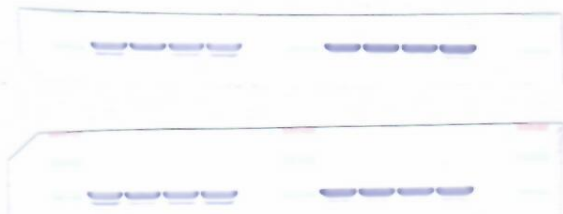

Actin

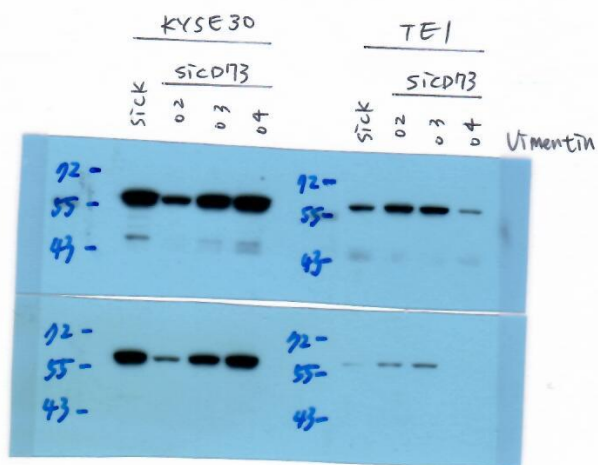

Vimentin

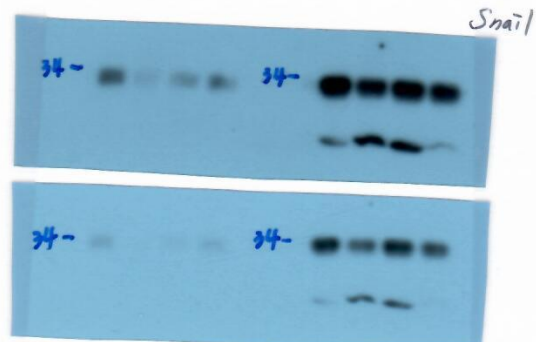

Snail

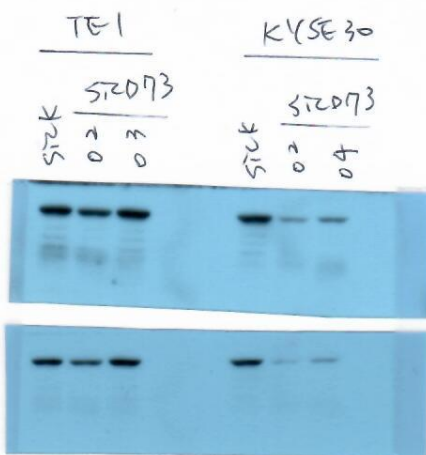

Vimentin

Supplement: s1 [file s1]
